# Supplementary material
Source: MDPI journal article supplement (https://www.mdpi.com/2073-4441/13/15/2047)
Supplement: s1 [file s1]

## **Degradation of diclofenac in urine by electro-permanganate process driven by microbial fuel cells**

Xuxu Wang<sup>a,b,&</sup>, Ying Wang<sup>a,b,&</sup>, Jian Zhang<sup>c</sup>, Pengbo Duanmu<sup>d</sup>, Liushi Zheng<sup>a,b</sup>, Shabi UI Hasson<sup>a,b</sup>, Andrew Baldwin<sup>a,b</sup>, Irene Wong<sup>a,b</sup>, Chun Zhao<sup>a,b,c,\*</sup>

<sup>a</sup>National Centre for International Research of Low-carbon and Green Buildings, Chongqing University, Chongqing 400045, PR China

<sup>b</sup>Key Laboratory of the Three Gorges Reservoir Region's Eco-Environment, Ministry of Education, Chongqing University, Chongqing 400045, PR China

<sup>c</sup>School of Water Conservancy and Architectural Engineering, Shihezi University, Shihezi, 832003, PR China

<sup>d</sup>School of Civil Engineering and Architecture, Zhongyuan University of Technology, Zhengzhou 450007, PR China

<sup>&</sup>These authors contributed equally to this work and should be considered co-first authors

\*Corresponding author: Chun Zhao (pureson@163.com; pureson@cqu.edu.cn +86-188-750-38854).

**Table S1** Compositions of mineral element

| Composition                   | Chemical Formula                                       | Concentration<br>(g L <sup>-1</sup> ) |
|-------------------------------|--------------------------------------------------------|---------------------------------------|
| Manganese sulfate             | MnSO <sub>4</sub> ·H <sub>2</sub> O                    | 0.5                                   |
| Friglycollamic acid           | C <sub>6</sub> H <sub>9</sub> NO <sub>6</sub>          | 1.5                                   |
| Magnesium sulfate             | MgSO <sub>4</sub> ·7H <sub>2</sub> O                   | 3                                     |
| Cobalt chloride               | CoCl <sub>2</sub> ·6H <sub>2</sub> O                   | 0.1                                   |
| Calcium chloride              | CaCl <sub>2</sub>                                      | 0.1                                   |
| Sodium chloride               | NaCl                                                   | 1                                     |
| Ferric sulfate                | FeSO <sub>4</sub> ·7H <sub>2</sub> O                   | 0.1                                   |
| Zinc sulfate                  | ZnSO <sub>4</sub> ·7H <sub>2</sub> O                   | 0.1                                   |
| Copper sulfate                | CuSO <sub>4</sub> ·5H <sub>2</sub> O                   | 0.01                                  |
| Boric acid                    | H <sub>3</sub> BO <sub>3</sub>                         | 0.01                                  |
| Sodium molybdate              | Na <sub>2</sub> MoO <sub>4</sub> ·2H <sub>2</sub> O    | 0.01                                  |
| Potassium aluminum<br>sulfate | AlK(SO <sub>4</sub> ) <sub>2</sub> ·12H <sub>2</sub> O | 0.01                                  |

**Table S2** Compositions of vitamin solution

| Composition         | Chemical formula                                                    | Concentration<br>(mg L <sup>-1</sup> ) |
|---------------------|---------------------------------------------------------------------|----------------------------------------|
| Vitamin B-2         | C <sub>17</sub> H <sub>20</sub> N <sub>4</sub> O <sub>6</sub>       | 5                                      |
| Lipoic acid         | C <sub>8</sub> H <sub>14</sub> O <sub>2</sub> S <sub>2</sub>        | 5                                      |
| Vitamin B-3         | C <sub>6</sub> H <sub>5</sub> NO <sub>2</sub>                       | 5                                      |
| Vitamin B-1         | C <sub>12</sub> H <sub>16</sub> N <sub>4</sub> OS·HCl               | 5                                      |
| Vitamin B-5         | C <sub>9</sub> H <sub>17</sub> NO <sub>5</sub>                      | 5                                      |
| 4-aminobenzoic acid | C <sub>7</sub> H <sub>7</sub> NO <sub>2</sub>                       | 5                                      |
| Vitamin H           | C <sub>10</sub> H <sub>16</sub> N <sub>2</sub> O <sub>3</sub> S     | 2                                      |
| Folic acid          | C <sub>19</sub> H <sub>19</sub> N <sub>7</sub> O <sub>6</sub>       | 2                                      |
| Vitamin B-6         | C <sub>8</sub> H <sub>12</sub> ClNO <sub>3</sub>                    | 10                                     |
| Vitamin B-12        | C <sub>63</sub> H <sub>88</sub> CoN <sub>14</sub> O <sub>14</sub> P | 0.1                                    |

Table S3. The comparison of the MFC-PM process with the other methods for the degradation of DCF

| System                                                                                         | Reaction conditions                                                 | Rection efficiency | <i>k</i> value                       | Ref       |
|------------------------------------------------------------------------------------------------|---------------------------------------------------------------------|--------------------|--------------------------------------|-----------|
| CoFe <sub>2</sub> O <sub>4</sub> /oxone system                                                 | [DCF] <sub>0</sub> = 10 mg L <sup>-1</sup> ,<br>Initial pH = 5.0    | 99 % (30 min)      | 13.8 s <sup>-1</sup>                 | [1]       |
| Photoelectrocatalytic system                                                                   | [DCF] <sub>0</sub> = 5 mg L <sup>-1</sup> , Initial<br>pH = 6.23    | 71.9% (6 h)        | 0.0036 s <sup>-1</sup>               | [2]       |
| Pyrite nanoparticles                                                                           | [DCF] <sub>0</sub> = 25 mg L <sup>-1</sup> ,<br>Initial pH = 3.0    | 100% (3 min)       | 0.461 s <sup>-1</sup>                | [3]       |
| hydrodynamic cavitation in conjunction with UV/TiO <sub>2</sub> /H <sub>2</sub> O <sub>2</sub> | [DCF] <sub>0</sub> = 20 mg L <sup>-1</sup> ,<br>Initial pH = 3.0    | 94.78% (120 min)   | 1.56 s <sup>-1</sup>                 | [4]       |
| UV-activated persulfate process                                                                | [DCF] <sub>0</sub> = 8.88 mg L <sup>-1</sup> ,<br>Initial pH = 6.0  | 83% (60 min)       | 5.0×10 <sup>-4</sup> s <sup>-1</sup> | [5]       |
| pulsed corona discharge system                                                                 | [DCF] <sub>0</sub> = 5 mg L <sup>-1</sup> , Initial<br>pH = 6.0     | 100% (10 min)      | -                                    | [6]       |
| Fenton reaction system                                                                         | [DCF] <sub>0</sub> = 5 mg L <sup>-1</sup> , Initial<br>pH = 4.0     | 95 % (180 s)       | 0.164 s <sup>-1</sup>                | [7]       |
| ultrasonic irradiation                                                                         | [DCF] <sub>0</sub> = 14.81 mg L <sup>-1</sup> ,<br>Initial pH = 7.0 | 67% (80 min)       | 1.79 s <sup>-1</sup>                 | [8]       |
| US/ZnO                                                                                         | [DCF] <sub>0</sub> = 10 mg L <sup>-1</sup> ,<br>Initial pH = 2.0    | 85% (15 min)       | -                                    | [9]       |
| Photoelectro-oxidation                                                                         | [DCF] <sub>0</sub> = 10 mg L <sup>-1</sup> ,<br>Initial pH = 5.6    | 85% (2h)           | 0.0191 s <sup>-1</sup>               | [10]      |
| MFC-PM                                                                                         | [DCF] <sub>0</sub> = 17.77 mg L <sup>-1</sup> ,<br>Initial pH = 3.0 | 94.75% (20 min)    | 9.30 s <sup>-1</sup>                 | This work |

**Table S4.** The reaction kinetics of DCF removal in different PM concentrations, external resistances and water matrices by the MFC-PM process

| <b>PM dosages</b>           | <b><i>k</i> value (min<sup>-1</sup>)</b>                | <b>R<sup>2</sup></b> |
|-----------------------------|---------------------------------------------------------|----------------------|
| 15 µM                       | 0.051                                                   | 0.85                 |
| 30 µM                       | 0.138                                                   | 0.92                 |
| 45 µM                       | 0.192                                                   | 0.94                 |
| 60 µM                       | 0.129                                                   | 0.93                 |
| 75 µM                       | 0.390                                                   | 0.91                 |
| <b>External resistances</b> | <b><i>k</i> value (min<sup>-1</sup>) (within 3 min)</b> | <b>R<sup>2</sup></b> |
| 0 Ω                         | 0.321                                                   | 0.89                 |
| 500 Ω                       | 0.319                                                   | 0.92                 |
| 2000 Ω                      | 0.279                                                   | 0.94                 |
| 5000 Ω                      | 0.243                                                   | 0.90                 |
| <b>Water matrices</b>       | <b><i>k</i> value (min<sup>-1</sup>)</b>                | <b>R<sup>2</sup></b> |
| Tap water                   | 0.106                                                   | 0.91                 |
| Surfaces water              | 0.083                                                   | 0.97                 |
| Ultrapure water             | 0.155                                                   | 0.96                 |

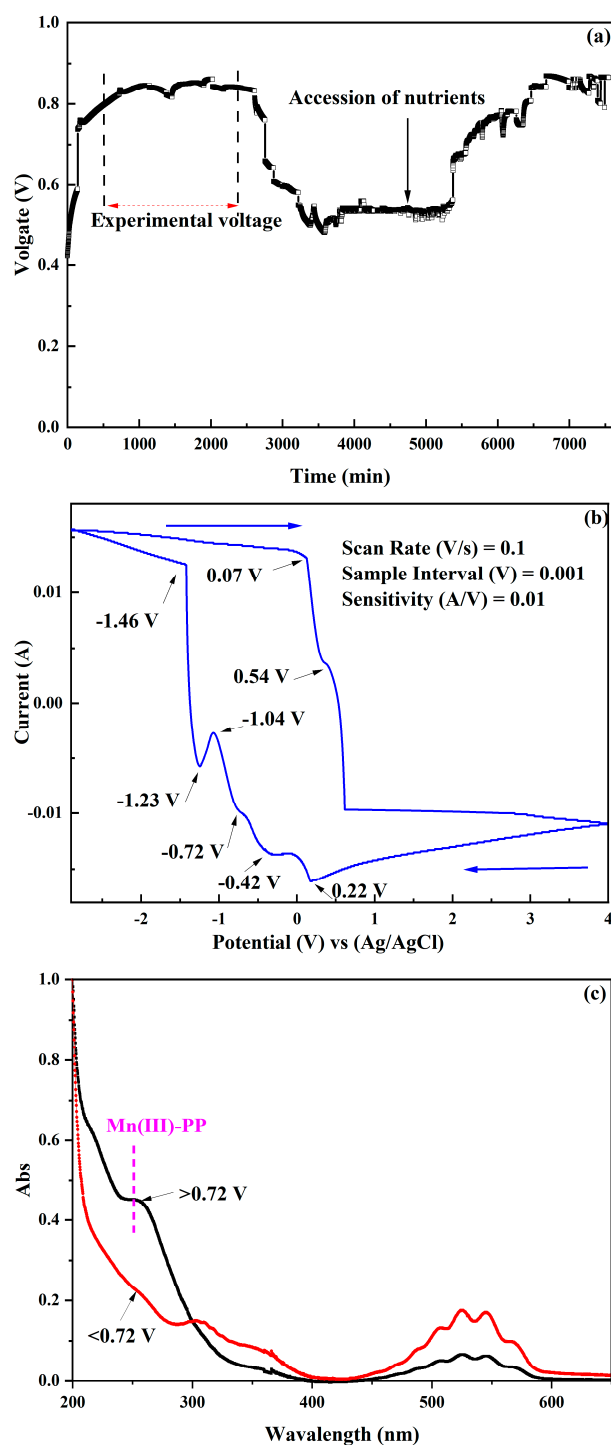

**Figure S1.** The change of voltage with time (a), cyclic voltammetry curve of PM (b), and UV-vis spectrum of PM under different potentials (c).

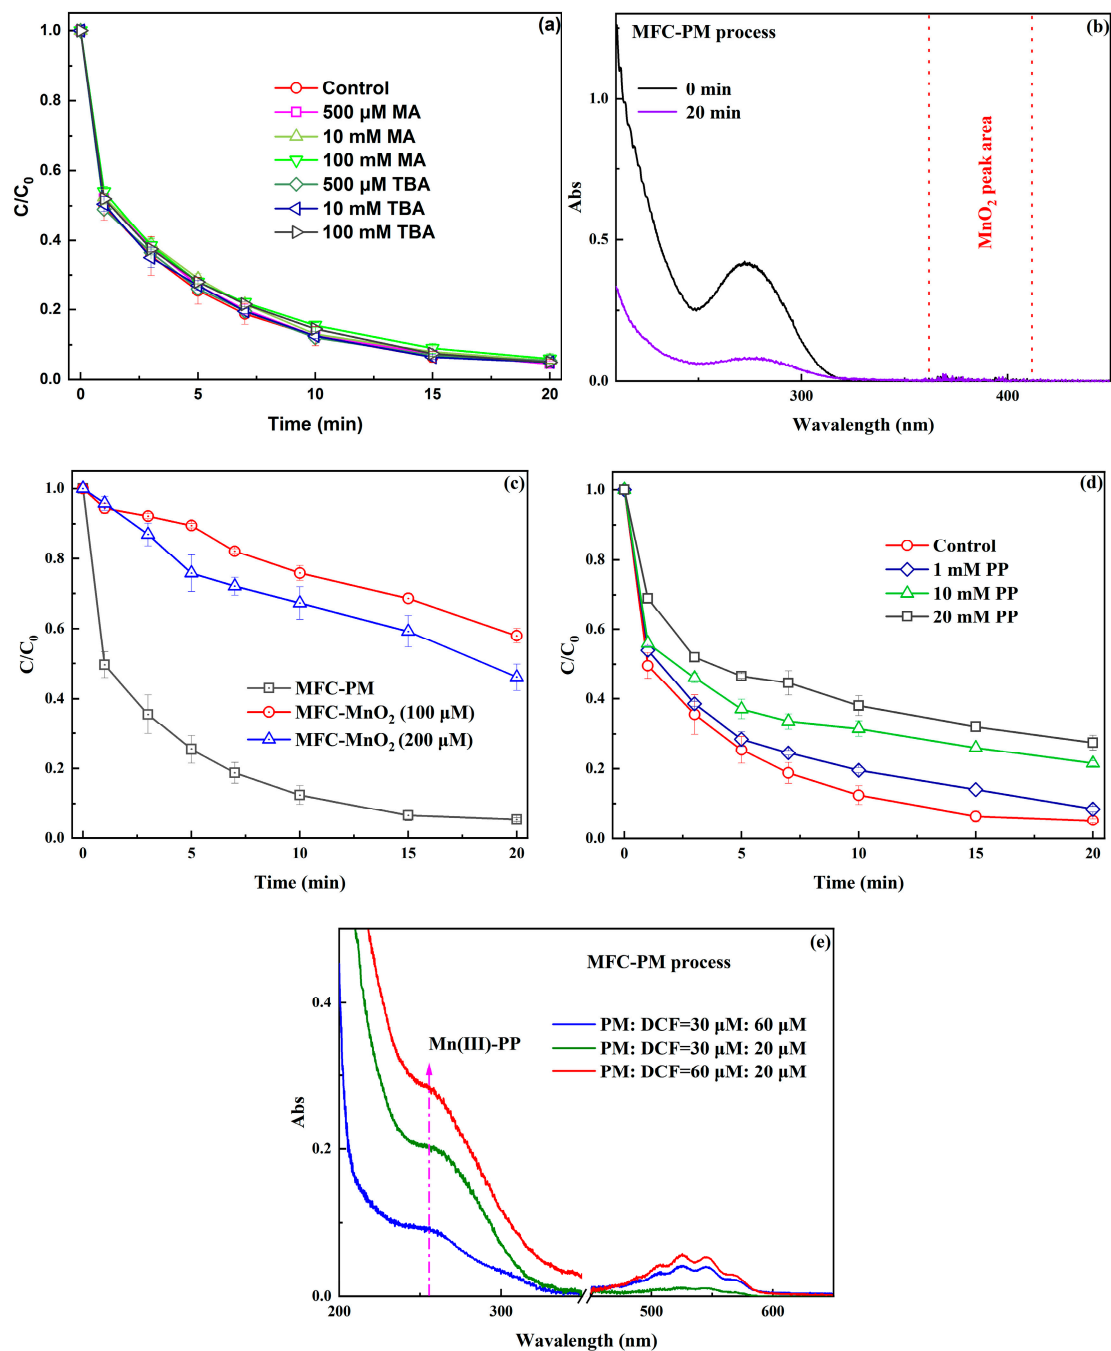

**Figure S2.** Effect of MA, TBA (a), UV-vis spectra of the the MFC-PM processes (b), effect of MnO<sub>2</sub> (c) and PP (d) on the removal of DCF, and the peaks of Mn(III)aq (e) in different PM/DCF ratios with 10 mM PP.

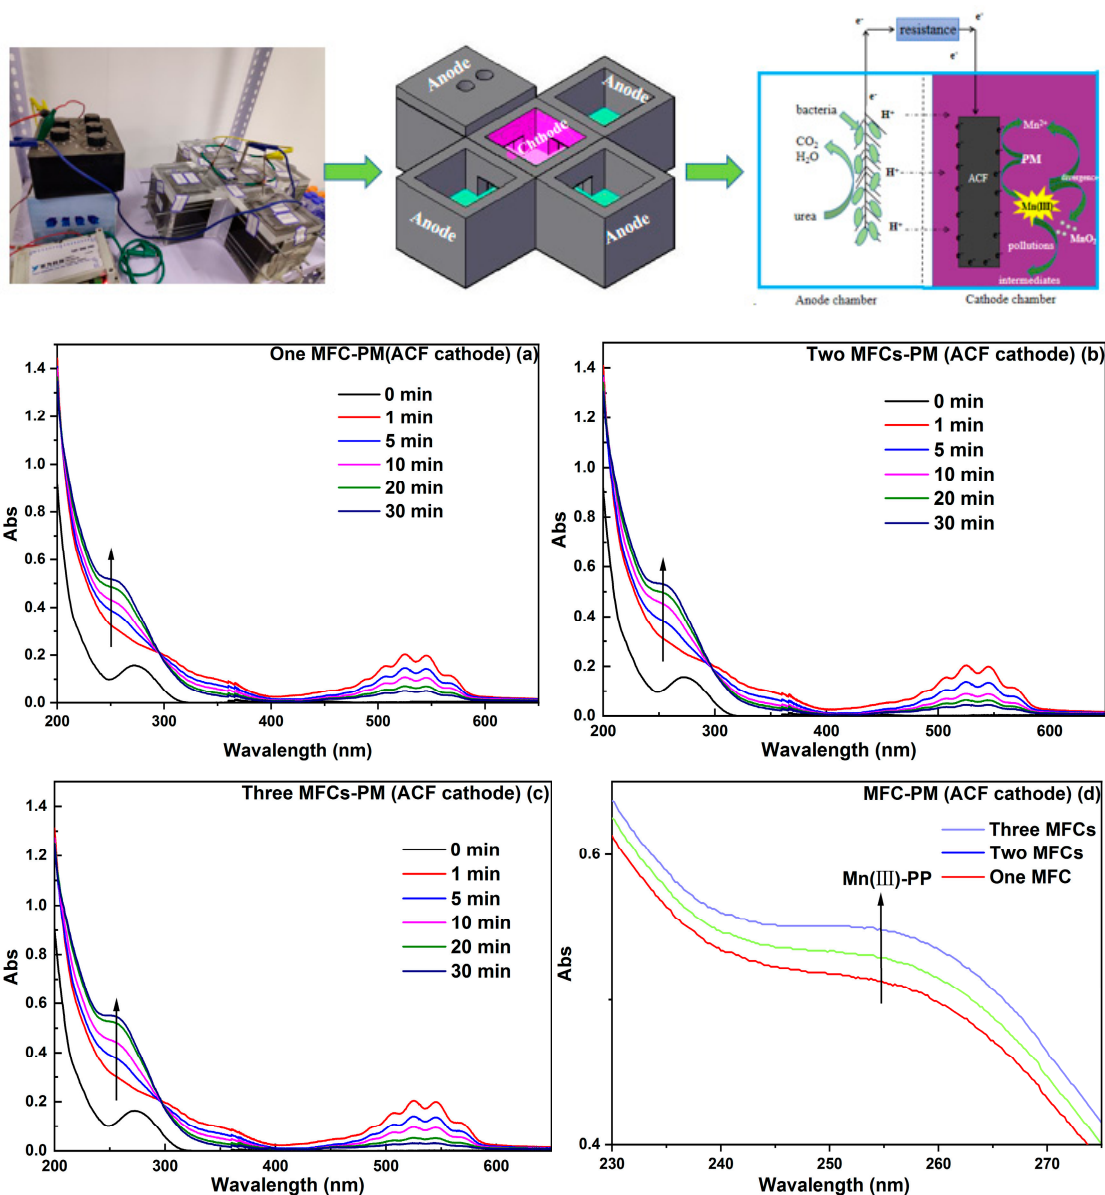

**Figure S3.** Diagram of MFC with multi-anodes and single cathode and UV-vis spectra with one anode (a), two anodes (b), three anodes (c) in the MFC-PM (ACF cathode) system (ACF was used as cathode electrode), and the comparison of peaks of  $\text{Mn(III)}_{\text{aq}}$  with different number of anodes (d).

Community analysis sunburst plot on OTU level:

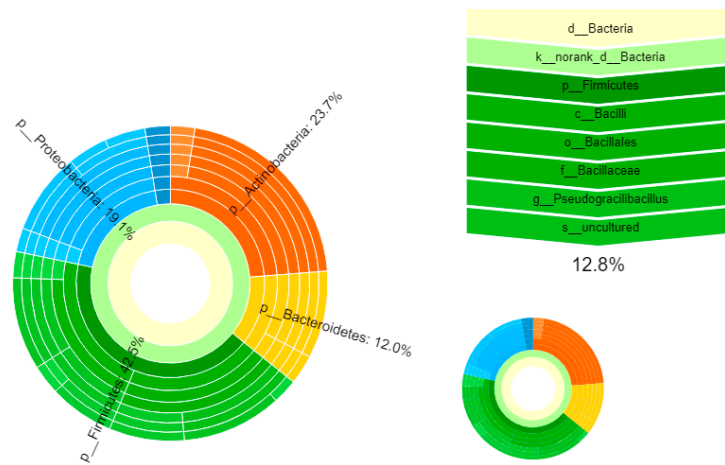

**Figure S4.** Taxonomy of microbial communities classified at the phylum level on the anode of MFC.

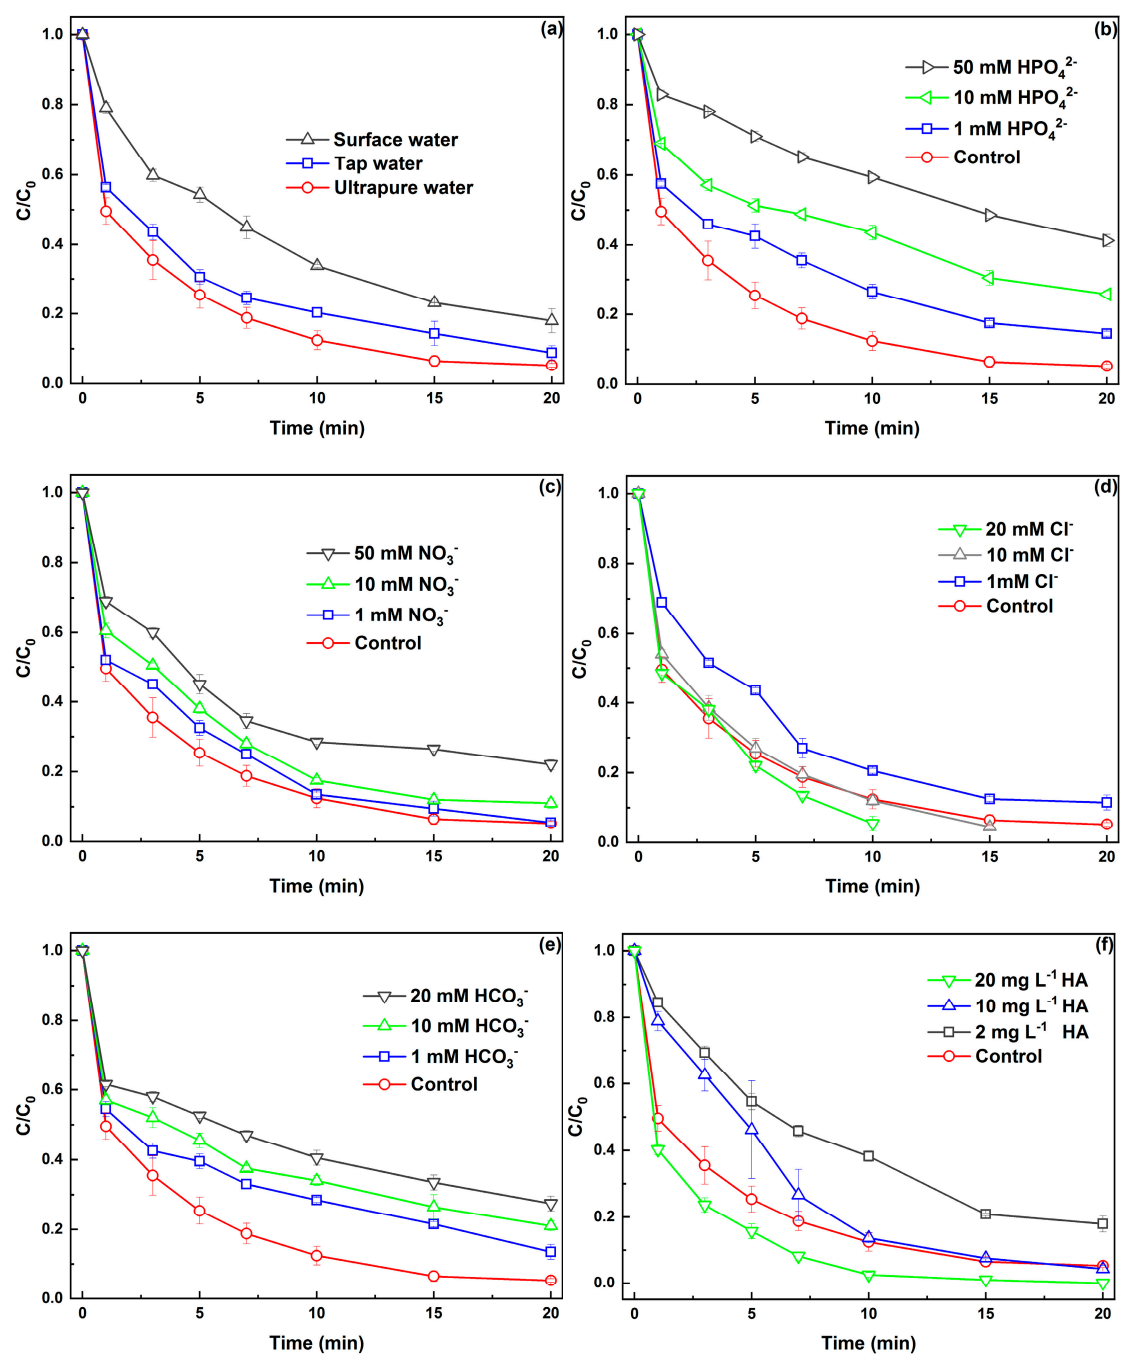

**Figure S5.** Effect of water matrices (a),  $\text{HPO}_4^{2-}$  (b),  $\text{NO}_3^-$  (c),  $\text{Cl}^-$  (d),  $\text{HCO}_3^-$  (e), and HA (f) on the removal of DCF in the MFC-PM system.

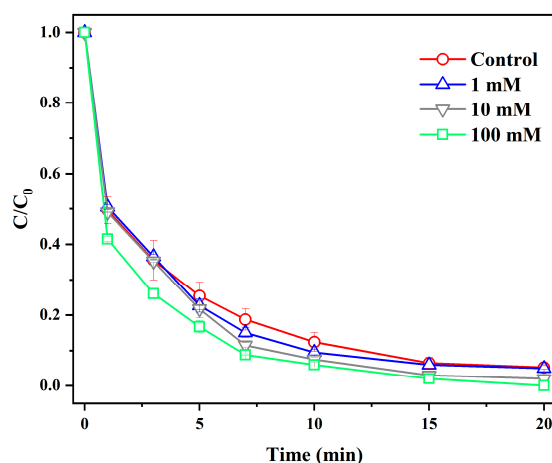

**Figure S6.** Effect of urea on the removal of DCF in the MFC-PM system.

### References:

- [1] Deng, J.; Shao, Y.; Gao, N.; Tan, C.; Zhou, S.; Hu, X. CoFe<sub>2</sub>O<sub>4</sub> magnetic nanoparticles as a highly active heterogeneous catalyst of oxone for the degradation of diclofenac in water. *J. Hazard. Mater.* 2013, 262, 836-844.
- [2] Hua, Z.; Dai, Z.; Bai, X.; Ye, Z.; Wang, P.; Gu, H.; Huang, X. Copper nanoparticles sensitized TiO<sub>2</sub> nanotube arrays electrode with enhanced photoelectrocatalytic activity for diclofenac degradation. *Chem. Eng. J.* 2016, 283, 514-523.
- [3] Khabbaz, M.; Entezari, M.H. Degradation of Diclofenac by sonosynthesis of pyrite nanoparticles. *J. Environ. Manage.* 2017, 187, 416-423.
- [4] Bagal, M.V.; Gogate, P.R. Degradation of diclofenac sodium using combined processes based on hydrodynamic cavitation and heterogeneous photocatalysis. *Ultrason. Sonochem.* 2014, 21, 1035-1043.
- [5] Lu, X.; Shao, Y.; Gao, N.; Chen, J.; Zhang, Y.; Xiang, H.; Guo, Y. Degradation of diclofenac by UV-activated persulfate process: Kinetic studies, degradation pathways and toxicity assessments. *Ecotox. Environ. Safe.* 2017, 141, 139-147.
- [6] Dobrin, D.; Bradu, C.; Magureanu, M.; Mandache, N.B.; Parvulescu, V.I. Degradation of diclofenac in water using a pulsed corona discharge. *Chem. Eng. J.* 2013, 234, 389-396.
- [7] Bae, S.; Kim, D.; Lee, W. Degradation of diclofenac by pyrite catalyzed Fenton oxidation. *Applied Catalysis B: Environmental.* 2013, 134-135, 93-102.
- [8] Nie, E.; Yang, M.; Wang, D.; Yang, X.; Luo, X.; Zheng, Z. Degradation of diclofenac by ultrasonic irradiation: Kinetic studies and degradation pathways. *Chemosphere.* 2014, 113, 165-170.
- [9] Huang, T.; Zhang, G.; Chong, S.; Liu, Y.; Zhang, N.; Fang, S.; Zhu, J. Effects and mechanism of diclofenac degradation in aqueous solution by US/Zn<sup>0</sup>. *Ultrason. Sonochem.* 2017, 37, 676-685.
- [10] Liu, S.; Zhao, X.; Zeng, H.; Wang, Y.; Qiao, M.; Guan, W. Enhancement of photoelectrocatalytic degradation of diclofenac with persulfate activated by Cu cathode. *Chem. Eng. J.* 2017, 320, 168-177.
